# Supplementary material for: Synergistic coupling of interface ohmic contact and LSPR effects over Au/Bi 24 O 31 Br 10 nanosheets for visible-light-driven photocatalytic CO 2 reduction to CO
Source: Royal Society of Chemistry journal article supplement (doi:10.1039/d3sc03474g), 2023-01-01
Supplement: d3sc03474g1.pdf [file d3sc03474g1.pdf]

## Supporting Information

**Synergistic coupling of interface ohmic contact and LSPR effects  
regulates over Au/Bi<sub>24</sub>O<sub>31</sub>Br<sub>10</sub> nanosheets for visible-light-driven  
photocatalytic CO<sub>2</sub> reduction to CO**

**Jie Liu, Yu Xie\*, Yiqiao Wang, Kai Yang, Shuping Su, Yun Ling, Pinghua Chen**

**School of Environmental and Chemical Engineering, Nanchang Hangkong University**

**No. 696 South Fenghe Avenue, Nanchang, Jiangxi Province, China, 330063**

\* **Contact:** [xieyu\\_121@163.com](mailto:xieyu_121@163.com)

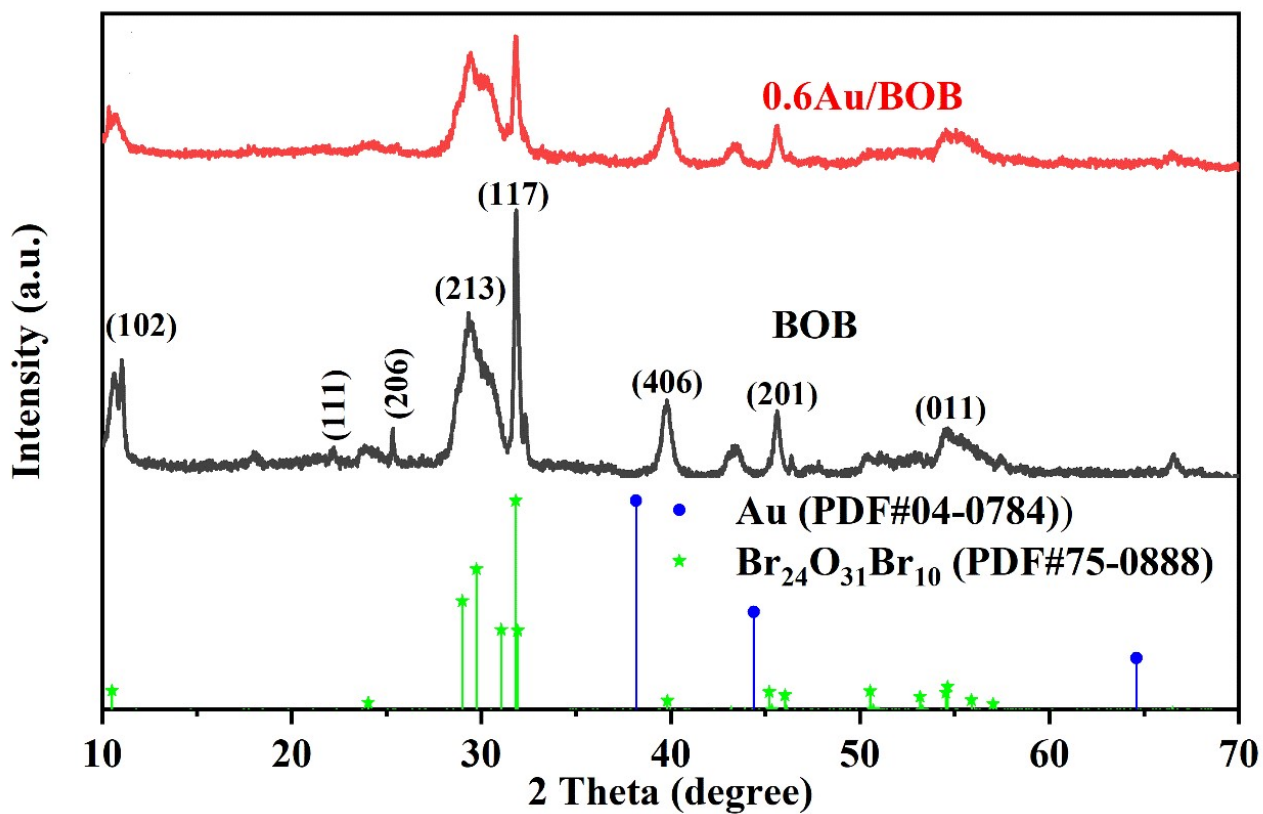

Fig. S1. XRD patterns of BOB and 0.6Au/BOB photocatalysts.

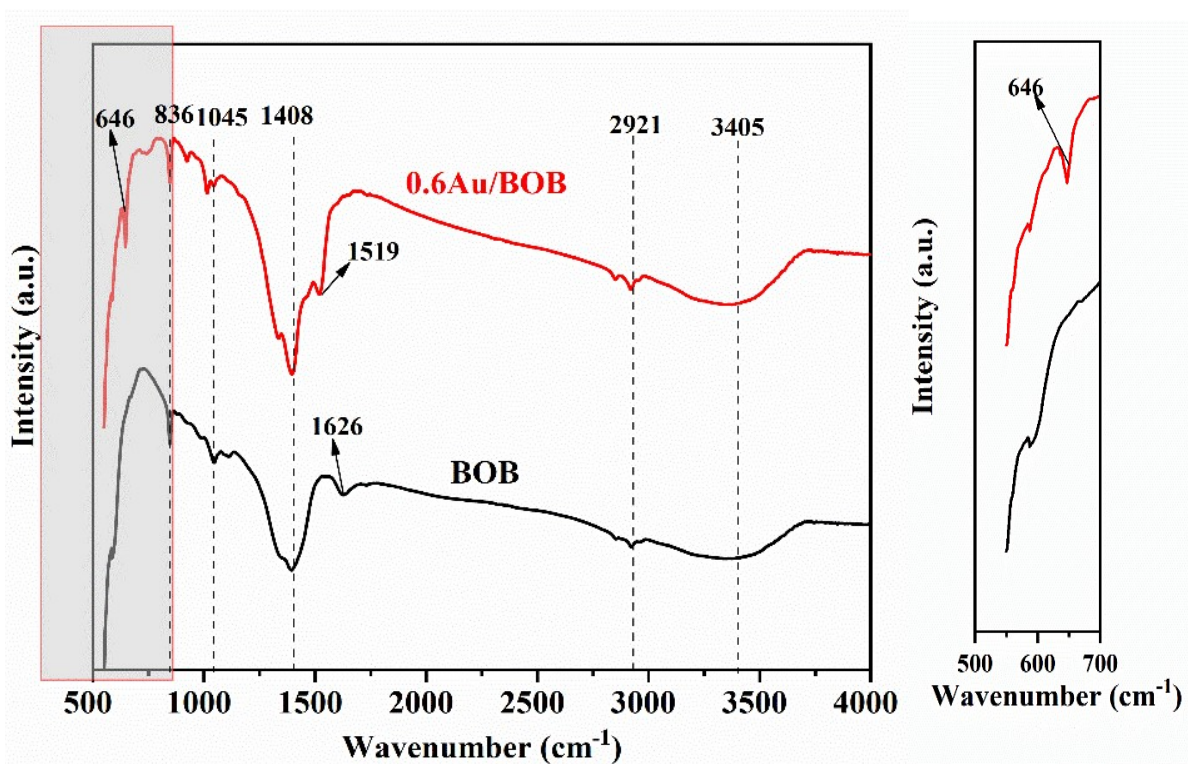

Fig. S2. FTIR patterns of BOB and 0.6Au/BOB photocatalysts.

The chemical structure information of BOB and 0.6Au/BOB was also analyzed by FTIR. Fig. S2 shows that the peaks of 836 and 1408  $\text{cm}^{-1}$  belong to the vibrational state of Bi-O bond and Bi-Br bond. The peaks at 1045 and 2921  $\text{cm}^{-1}$  belong to the stretching state of C=O and the vibration state of C-H. In addition, the characteristic peaks at 1519, 1626 and 3405  $\text{cm}^{-1}$  originate from water molecules and hydroxyl groups. Thus, the 0.6Au/BOB composite shows a new characteristic peak at 661  $\text{cm}^{-1}$ , corresponding to the Au-Bi-O vibrational state, which further confirms the successful synthesis of the composite photocatalyst.

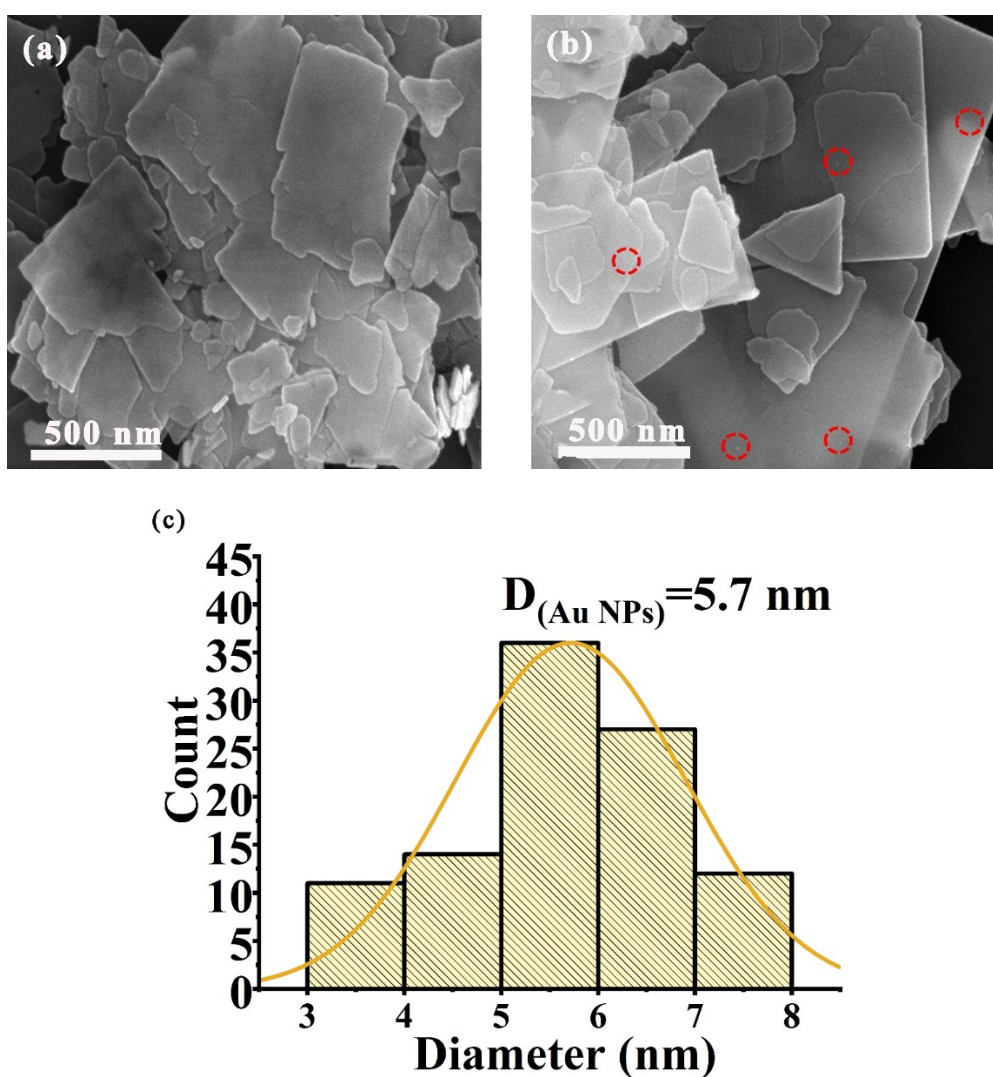

Fig. S3. SEM images of (a) BOB and (b) 0.6Au/BOB; (c) Size distribution of Au NPs.



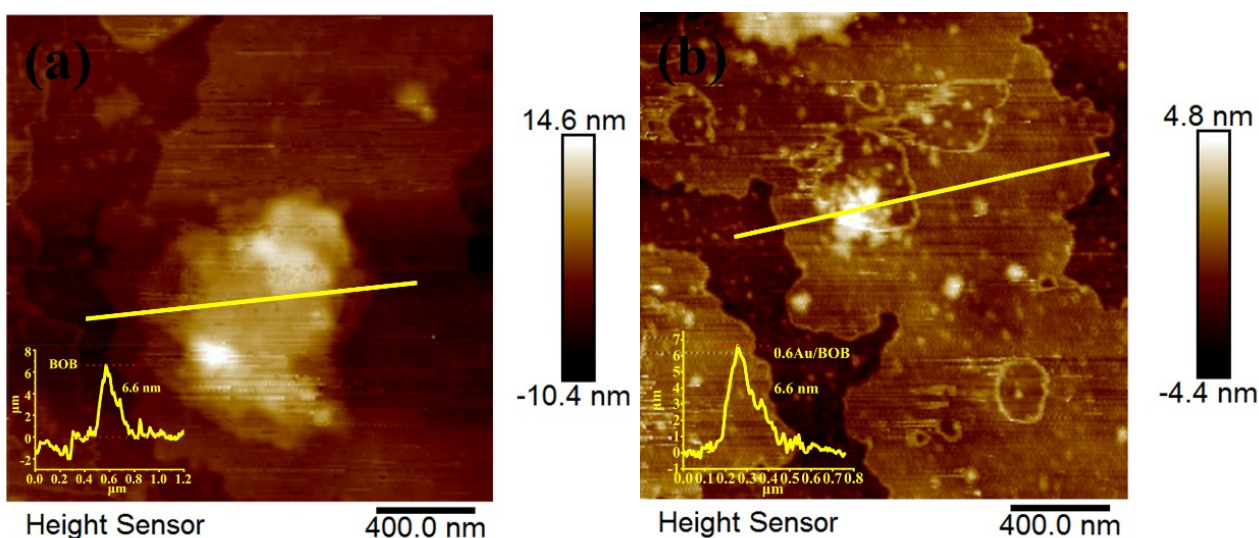

**Fig. S4.** AFM images of BOB and 0.6Au/BOB.

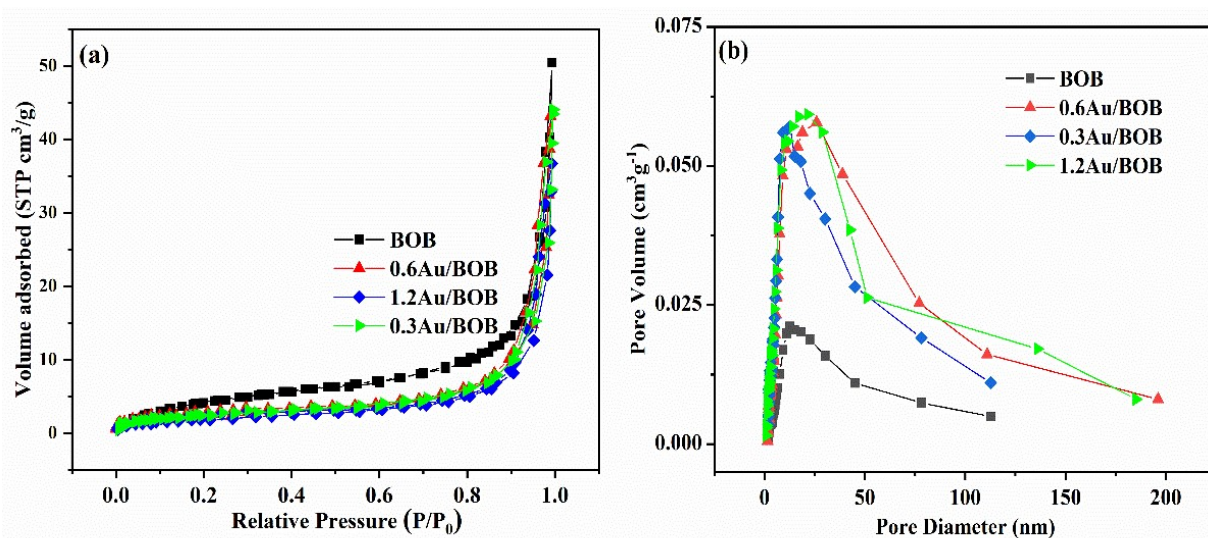

**Fig. S5.** (a) N<sub>2</sub> adsorption-desorption isotherms and (b) pore diameter distribution of BOB, 0.3Au/BOB, 0.6Au/BOB and 1.2Au/BOB.

By using N<sub>2</sub> adsorption-desorption experiments, the specific surface area and pore size distributions of the samples were measured. As shown in **Fig. S5a-b**, BOB, 0.3Au/BOB, 0.6Au/BOB and 1.2Au/BOB exhibit type IV adsorption isotherms and H3 hysteresis loops<sup>2</sup>, indicating mesopore structure. The specific surface areas of BOB, 0.3Au/BOB, 0.6Au/BOB and 1.2Au/BOB are displayed in **Table S2** at 3.995, 5.636, 7.874 and 9.634 m<sup>2</sup>g<sup>-1</sup>, respectively. Among them, Au/BOB composite has a larger specific surface area than the pure BOB, which can be attributed to the fine distribution of Au NPs on its surface. The fine dispersion of Au NPs on the surface makes the Au/BOB composite

has a larger surface area than pure BOB. Meanwhile, further comparison between Fig.4a and Table S2 shows that although the performance of 0.6Au/BOB is the highest, the specific surface area is not the highest, which shows that the specific surface area does not significantly affect the performance of Au/BOB composite.

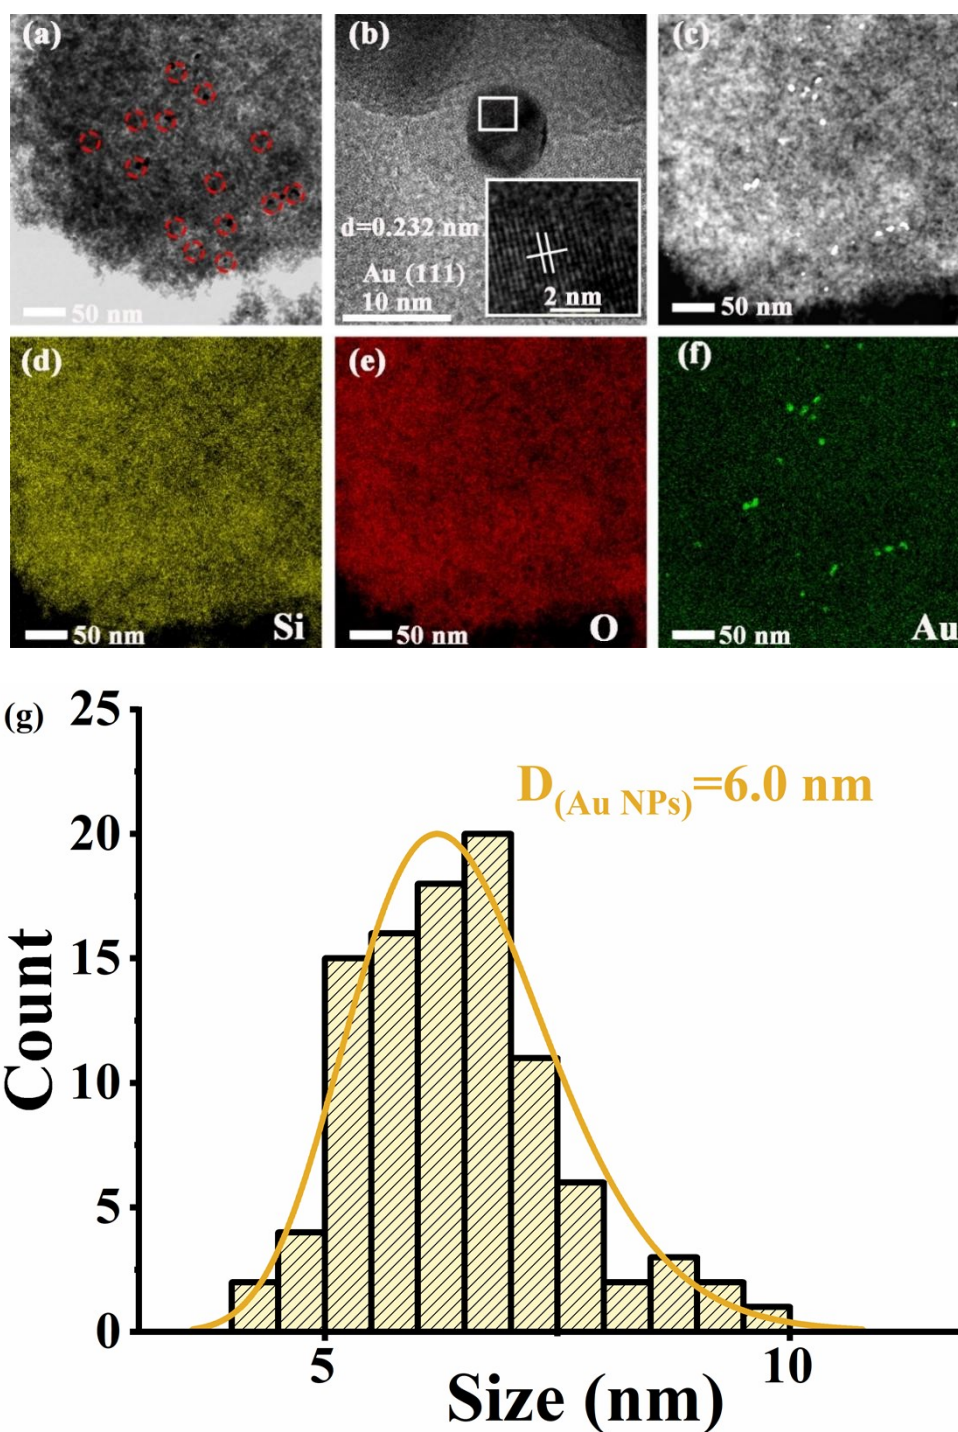

Fig. S6. TEM images of (a-f) 0.6Au/SiO<sub>2</sub>; (g) Size distribution of Au NPs.

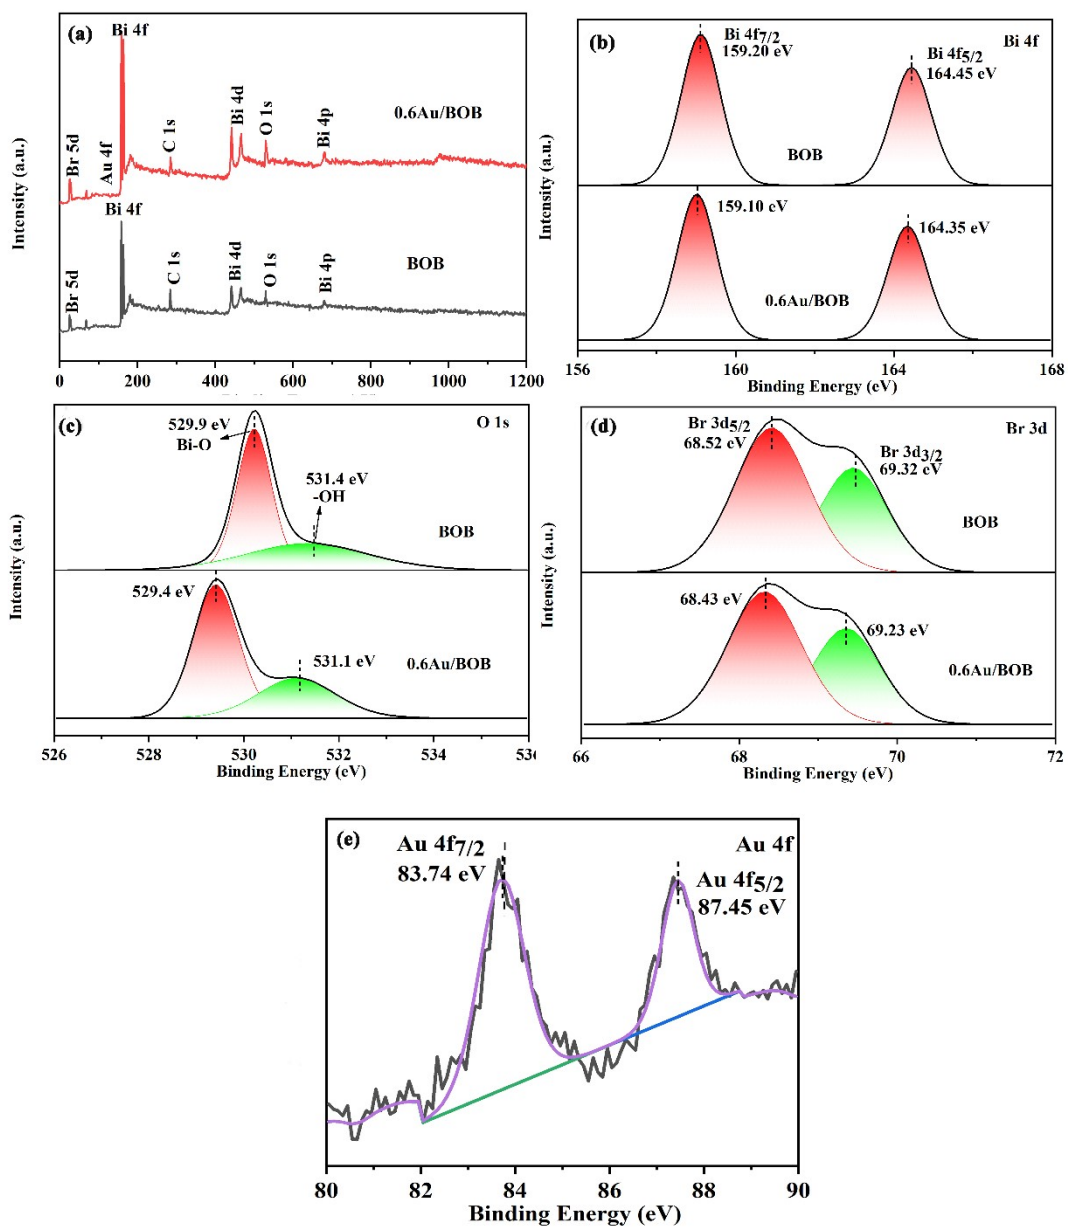

**Fig. S7.** High-resolution XPS spectra of (a) survey, (b) Bi 4f, (c) O 1s, (d) Br 3d and (e) Au 4f for BOB and 0.6Au/BOB.

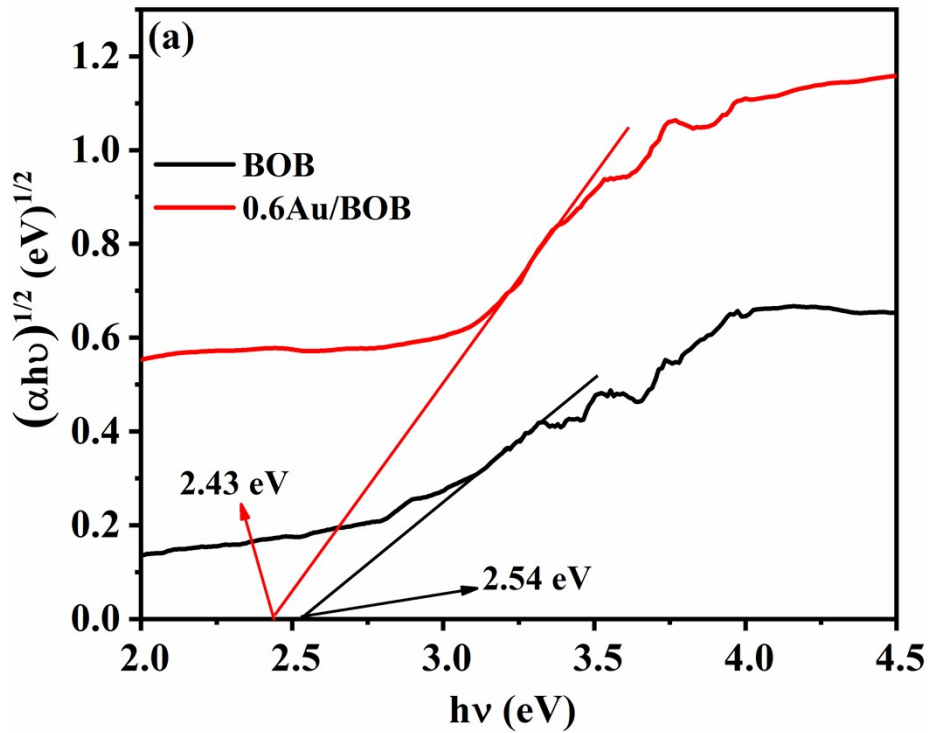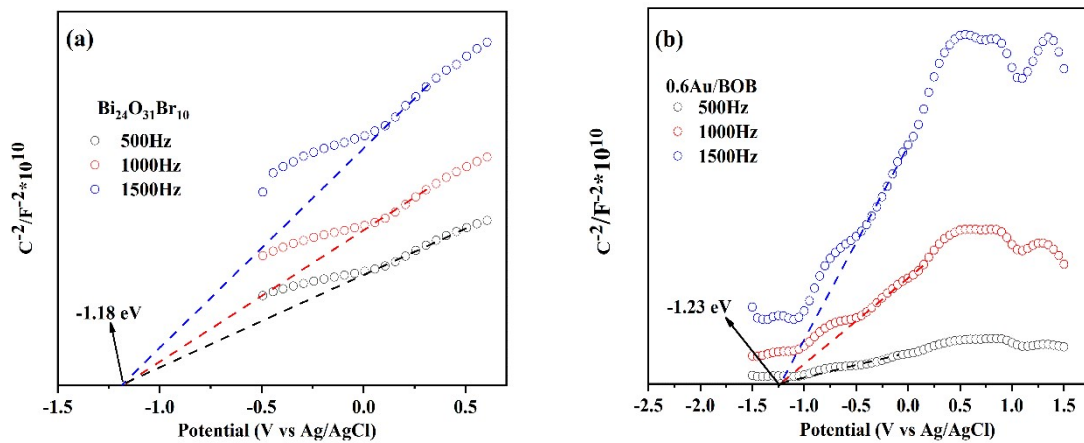

**Fig. S8.** (a) The band gap of BOB and 0.6Au/BOB; Mott-Schottky plots of (a) BOB and (b) 0.6Au/BOB at various frequencies.

The band gap values of BOB and 0.6Au/BOB can be obtained according to UV-vis DRS spectrum and the following Tauc curve <sup>2</sup>:

$$(\alpha hv)^{1/n} = A (hv - E_g) \quad (1)$$

where  $\alpha$ ,  $hv$ ,  $A$  and  $E_g$  represent absorption coefficient, photon energy, constant and band gap, respectively. Since BOB is indirect semiconductors, the value of  $n$  is 2. Therefore, the band gap of



BOB and 0.6Au/BOB were calculated to be 2.54 and 2.43 eV (**Fig. S8a**), respectively, which were consistent with those reported in the literature. To further determine the possible band gap structure of the samples, the flat band potential ( $E_{FB}$ ) of BOB and 0.6Au/BOB was analyzed using the Mott-Schottky curve. As shown in **Fig. S8b-c**, the positive slope of Mott-Schottky curve indicated that BOB is all n-type semiconductors. The CB potential ( $E_{CB}$ ) of n-type semiconductors was like that of  $E_{FB}$ . According to the equation of  $E_{VB} = E_g + E_{CB}$ , the  $E_{CB}$  of BOB and 0.6Au/BOB were -1.18 and -1.23 eV vs. Ag/AgCl (-0.97 and -1.02 V vs. NHE), respectively. The valence band potentials ( $E_{VB}$ ) of BOB and 0.6Au/BOB were estimated are 1.36 and 1.20 eV vs. Ag/AgCl (1.57 and 1.41 V vs. NHE), respectively. With the loading of Au NPs, the  $E_{CB}$  of 0.6Au/BOB shifts upward, indicating the enhanced reduction of  $CO_2$ -CO ( $CO_2/CO = -0.53$  V).

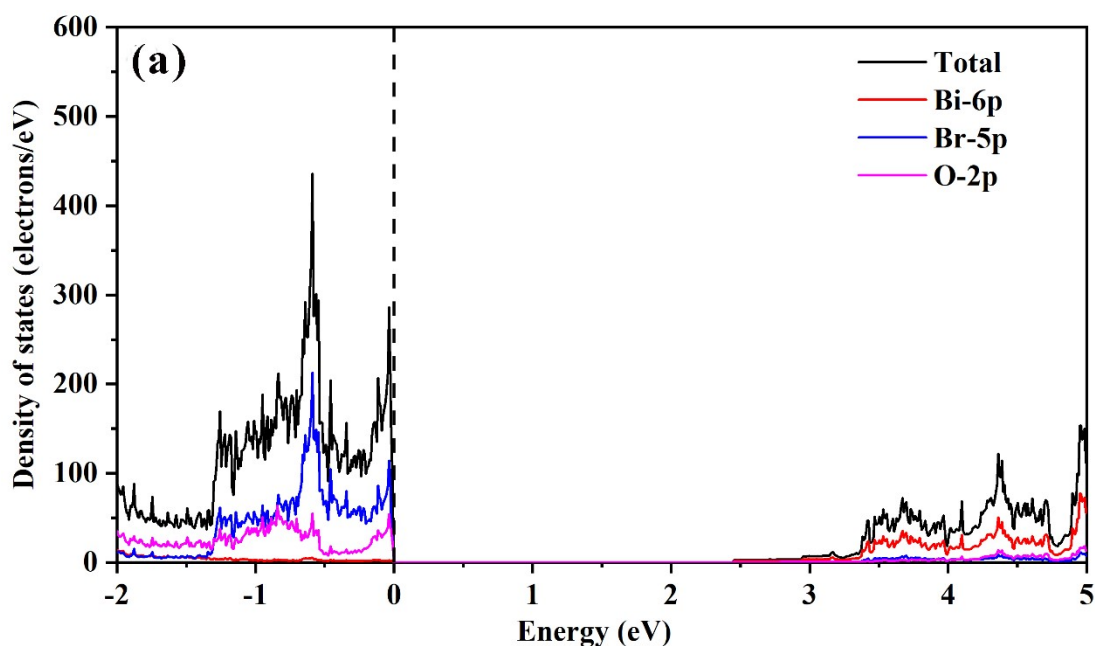



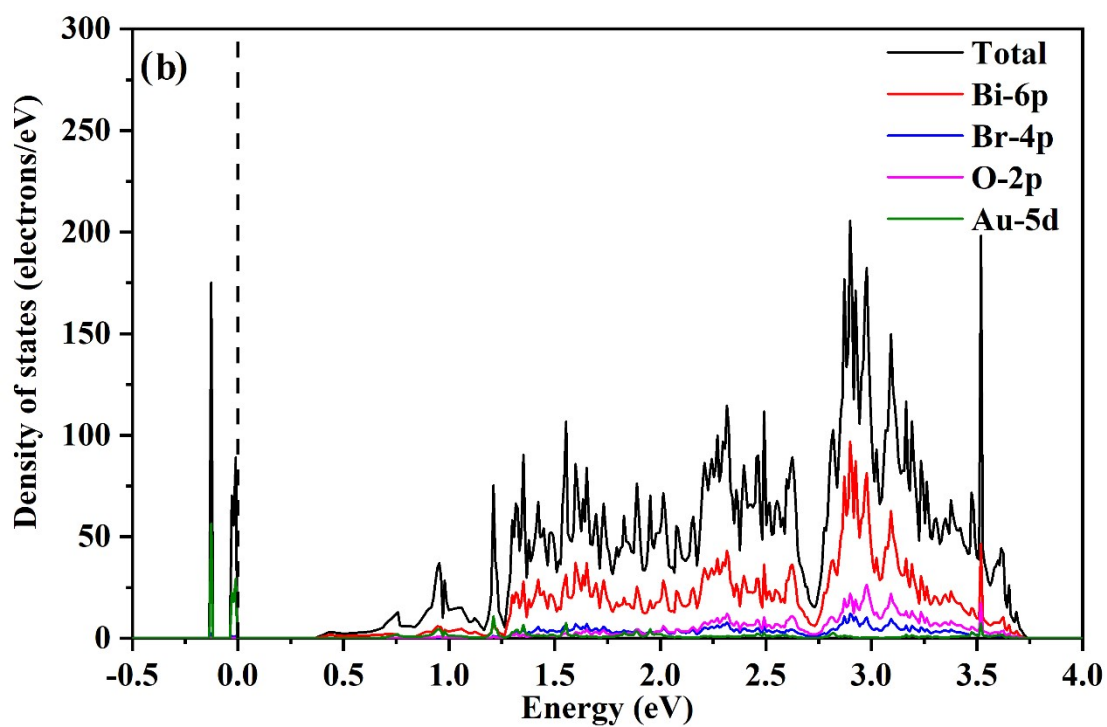

Fig. S9. Calculated DOS of (a) BOB and (b) Au/BOB composite.

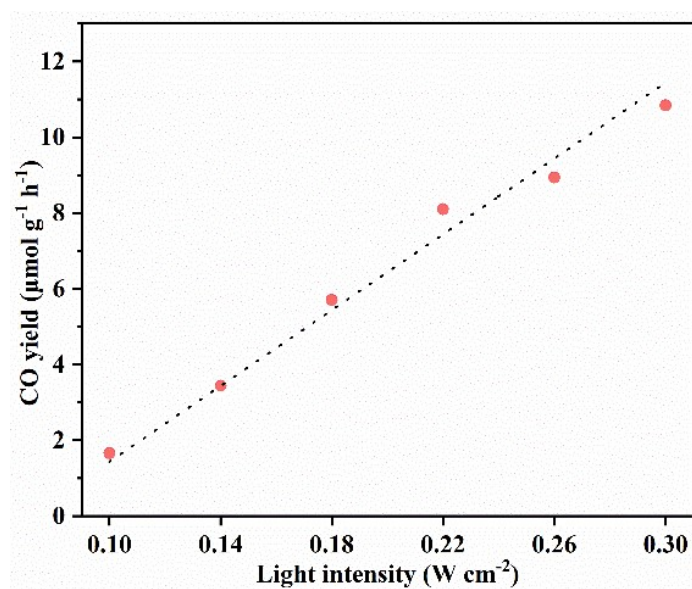

Fig. S10. CO yield plotted as a function of light intensity.

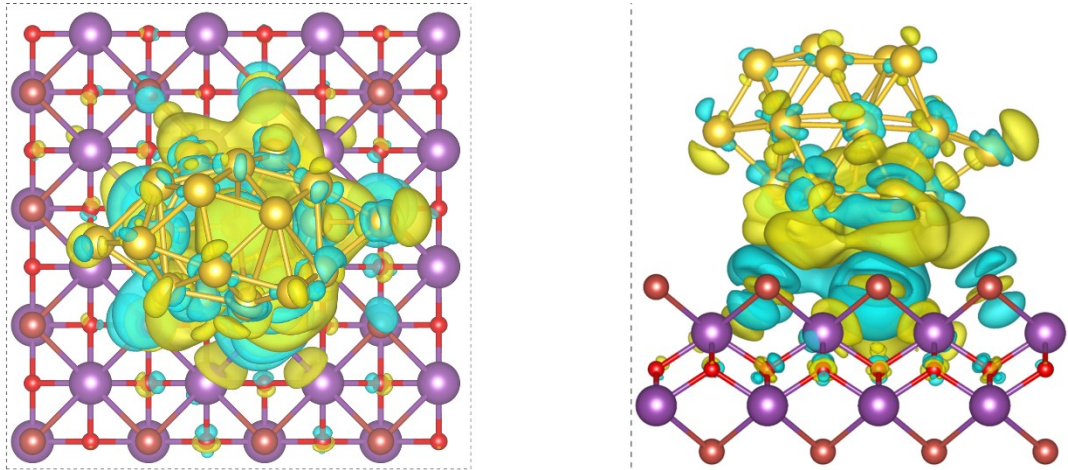

**Fig. S11.** Top and side view of charge density difference of BOB loading AuNPs. Charge accumulation and depletion are marked by cyan and yellow area, respectively. The isosurface level is  $5E-4 \text{ e}\text{\AA}^{-3}$ .

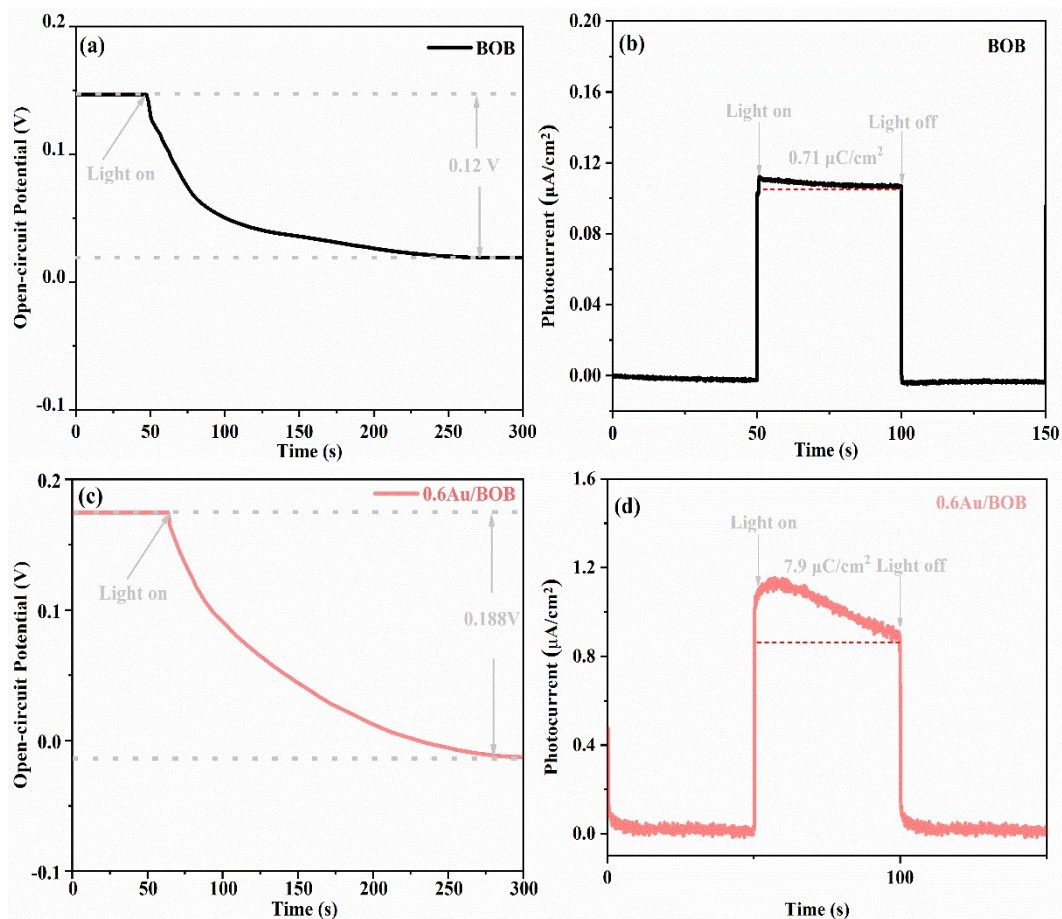

**Fig. S12.** (a) The surface voltage of BOB; (b) the surface accumulated electrons density of BOB; (c) the surface voltage of 0.6Au/BOB; (d) the surface accumulated electrons density of 0.6Au/BOB.

The internal electrical field intensity is calculated based on equation <sup>3</sup>:

$$F_s = (-2V_s \rho / \epsilon \epsilon_0)^{1/2} \quad (2)$$

where  $F_s$  is the internal electrical field magnitude,  $V_s$  is the surface voltage,  $\rho$  is the surface charge density,  $\epsilon$  is the low frequency dielectric constant, and  $\epsilon_0$  is the permittivity of free space. Because the  $\epsilon$  and  $\epsilon_0$  are constants, the internal electrical field magnitude can be determined by the surface voltage and the surface charge density. The surface charge density can be obtained by the integral of the transient anodic photocurrent peak. The surface voltage can be measured by the open-circuit potentials. So, we can qualitatively compare the internal electrical field magnitude according to the  $(V_s\rho)^{1/2}$  values.

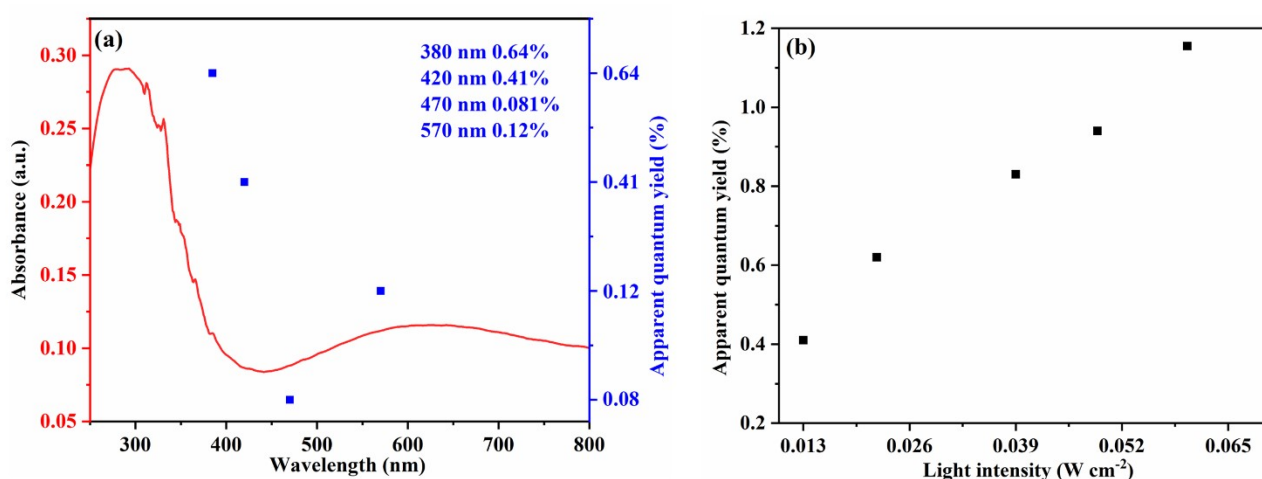

**Fig. S13.** (a) Wavelength and (b) light intensity-dependent apparent quantum yield (AQY) of 0.6Au/BOB.

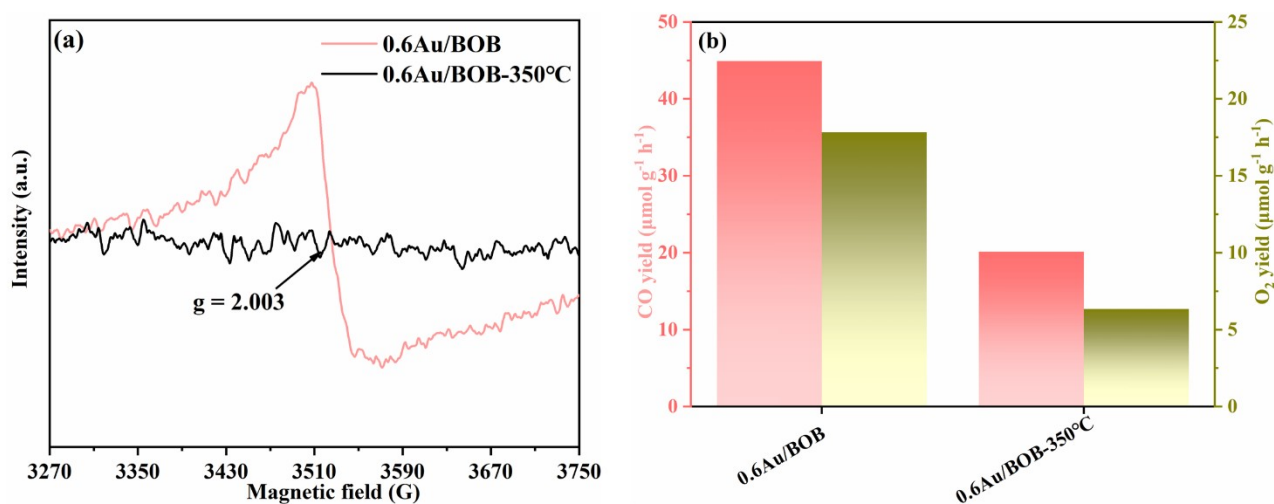

**Fig. S14.** (a) EPR spectra and (b) Yield of CO and  $O_2$  of 0.6Au/BOB and 0.6Au/BOB-350°C.

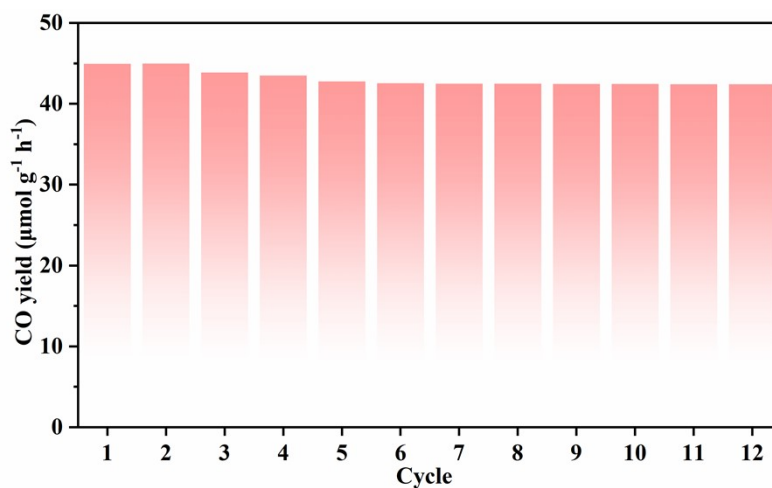

**Fig. S15.** Photocatalytic CO evolution stability experiment of 0.6Au/BOB.

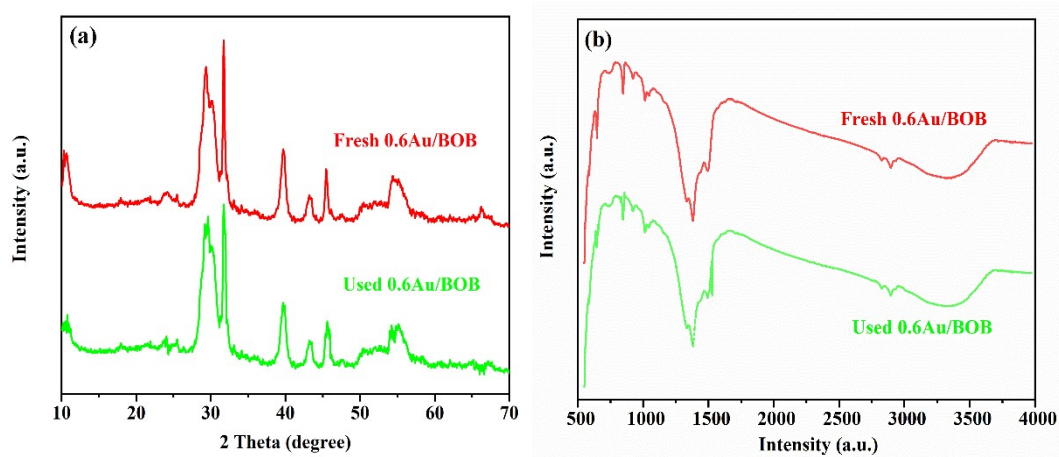

**Fig. S16.** (a) XRD patterns and (b) FTIR spectra of the fresh and used 0.6Au/BOB.

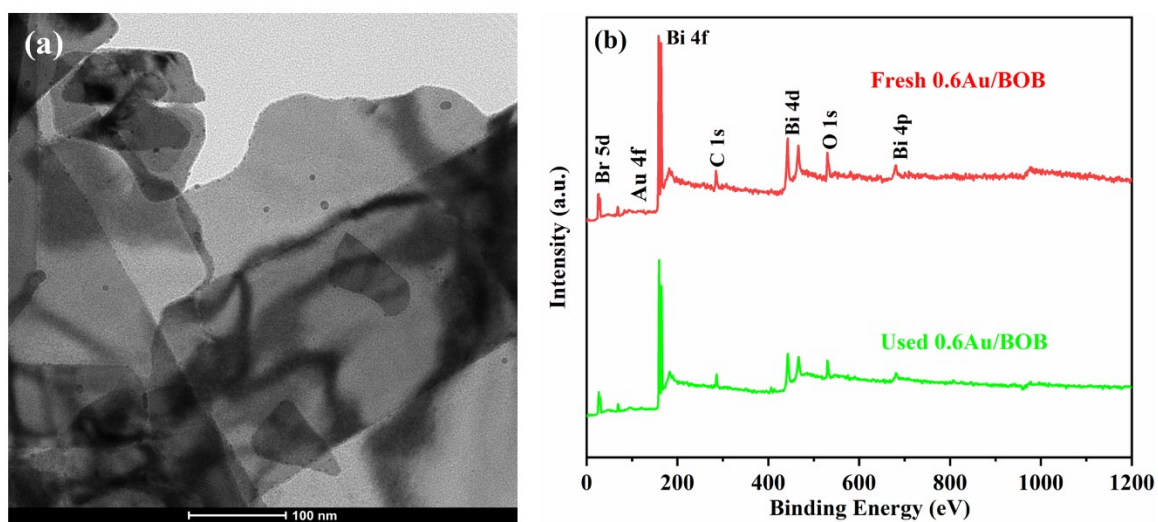

**Fig. S17.** (a) EPR spectra and (b) Yield of CO and O<sub>2</sub> of 0.6Au/BOB and 0.6Au/BOB-350°C.



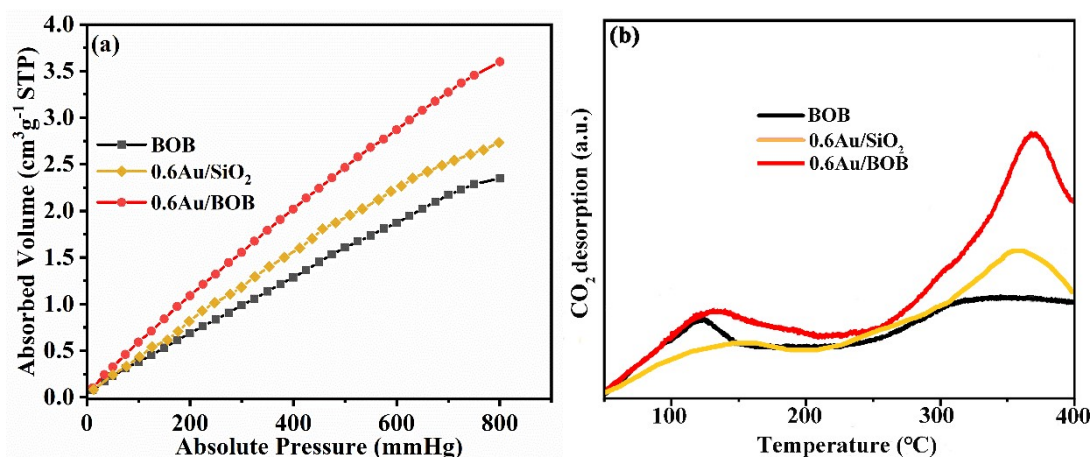

**Fig. S18.** (a) CO<sub>2</sub> adsorption isotherms; (b) CO<sub>2</sub>-TPD of BOB, 0.6Au/SiO<sub>2</sub> and 0.6Au/BOB.

The adsorption and activation of CO<sub>2</sub> play an important factor affecting the performance of photocatalytic reduction of CO<sub>2</sub>. CO<sub>2</sub> adsorption and CO<sub>2</sub> temperature programmed desorption (CO<sub>2</sub>-TPD) were characterized<sup>4</sup>. As shown in **Fig. S18a**, 0.6Au/BOB has higher CO<sub>2</sub> adsorption capacity than 0.6Au/SiO<sub>2</sub> and naked BOB, which is beneficial to CO<sub>2</sub> activation. **Fig. S18b** displays that BOB has a new desorption peak near 125 °C, which belongs to the category of weak base peak, showing that BOB has CO<sub>2</sub> adsorption capacity. 0.6Au/SiO<sub>2</sub> has two desorption peaks at 160 °C and 360 °C<sup>5</sup>, the former belongs to weak base peak and the latter belongs to strong base peak, and the appearance of the latter is related to the loading of noble metal. Therefore, the appearance of strong base desorption peak of 0.6Au/BOB at 380 °C is related to the loading of Au NPs, which means that there are at least two adsorption sites on the surface of 0.6Au/BOB, and the peak intensity of strong base increases, which further proves that Au NPs can really improve the adsorption and activation of CO<sub>2</sub>. Therefore, 0.6Au/BOB is more favorable for CO<sub>2</sub> adsorption.

In addition, the active intermediates involved in the conversion of CO<sub>2</sub> to CO were studied by In-situ FTIR. Before the measurement, the impurity species on the surface of the catalyst were removed with argon. At the beginning of the measurement, the wet CO<sub>2</sub> was put into the in-situ cell, and then the active species adsorbed on the catalyst surface was observed in dark and light, respectively. As

shown in **Fig. S19a**, the characteristic vibrational bands of BOB near 1273 and 1671  $\text{cm}^{-1}$  are identified as  $\text{CO}_2^-$ <sup>6</sup>. The vibrational bands near 1299 belong to  $\text{m-CO}_3^{2-}$  and the vibrational bands near 1603  $\text{cm}^{-1}$  are assigned to  $\text{b-CO}_3^{2-}$ <sup>7</sup>. The absorption bands near 1383 and 1626  $\text{cm}^{-1}$  correspond to  $\text{HCO}_3^-$  and  $\text{H}_2\text{O}$ <sup>8</sup>, respectively. In addition, the vibrational bands near 1529 and 1637  $\text{cm}^{-1}$  belong to  $^*\text{COOH}$ <sup>8</sup>. As shown in **Fig. S19b**, compared with BOB, 0.6Au/BOB composite exhibits the same characteristic vibration band. Moreover, with the extension of light time, the accumulation of active species on 0.6Au/BOB is faster than that BOB, which means that Au NPs promote the generation of active intermediates. Overall,  $\text{CO}_2^-$ ,  $\text{m-CO}_3^{2-}$ ,  $\text{b-CO}_3^{2-}$  and  $^*\text{COOH}$  belong to the active intermediates involved in the conversion of  $\text{CO}_2$  to CO. In this one,  $^*\text{COOH}$  is a key active species for CO generation[10].

Furthermore, the Gibbs free energies of BOB and 0.6Au/BOB in each stage of photocatalytic  $\text{CO}_2$  reduction were also calculated by density functional theory, which is convenient to explore the reduction process of  $\text{CO}_2$  at atomic level. Based on the results of in-situ FTIR, four continuous reaction paths are proposed as follows: (1)  $\text{CO}_2$  molecules are adsorbed on the surfaces of the catalyst; (2)  $^*\text{CO}_2$  and  $^*\text{H}$  accept the electrons to form the  $^*\text{COOH}$  intermediate; (3) The  $^*\text{COOH}$  intermediate accepts a proton and removes  $\text{H}_2\text{O}$  molecules to form  $^*\text{CO}$ ; And (4)  $^*\text{CO}$  will be desorbed to produce CO, and the catalyst will also be restored to the initial state<sup>4</sup>. As shown in **Fig. 19c**, the barriers of BOB at steps (1) (3) and (4) belongs to negative feedback, which proves that these reactions can be carried out spontaneously ( $\Delta G < 0$ ). However, step (2) has a reaction barrier as high as 2.60 eV, directly confirming that it belongs to the rate-determining step of BOB. By comparison, 0.6Au/BOB has the same rate-determining step, but its potential barrier is only 0.74 eV, which means that it is easier to accumulate

\*COOH intermediates under the same conditions, and then complete the transformation of CO efficiently, which is consistent with the results of in-situ FTIR.

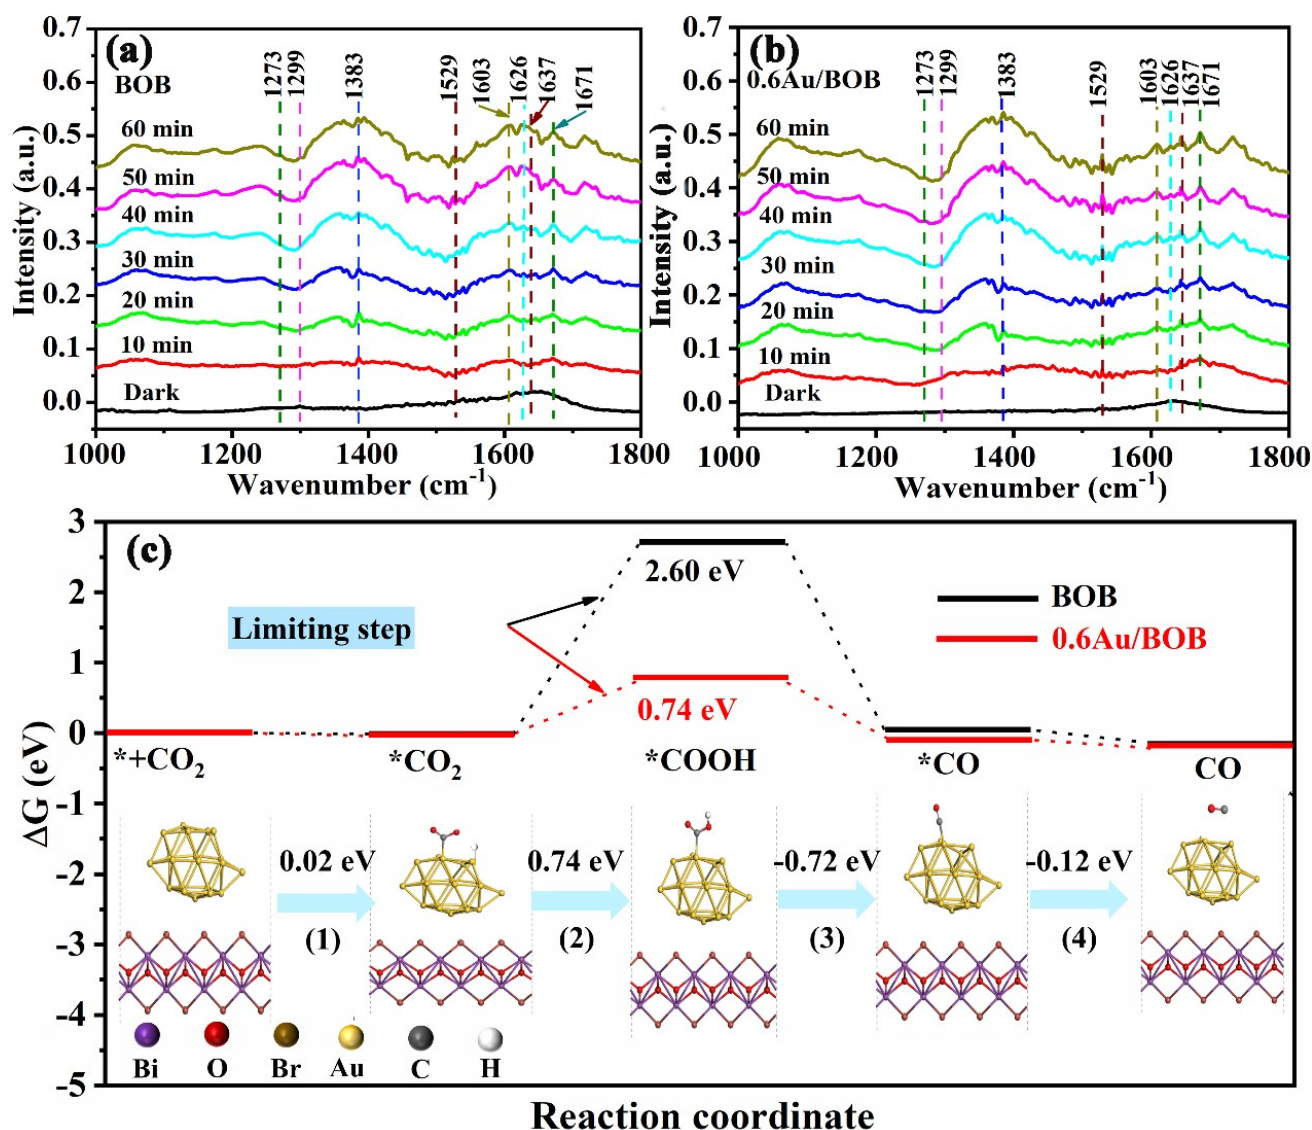

**Fig. S19.** In-situ FTIR of CO<sub>2</sub> adsorption over (a) BOB and (b) 0.6Au/BOB under visible light irradiation; (c) Calculated free energy diagrams for BOB and 0.6Au/BOB (where “\*” represents the adsorption state).

**Table S1.** Au NPs content in Au/BOB composite was measured by ICP.

| content                    | 0.3Au/BOB | 0.6Au/BOB | 1.2Au/BOB |
|----------------------------|-----------|-----------|-----------|
| Theoretical content (wt%)  | 0.3       | 0.6       | 1.2       |
| Experimental content (wt%) | 0.27      | 0.56      | 1.18      |

**Table S2.** Specific surface area, pore diameter and pore volume of BOB, 0.3Au/BOB, 0.6Au/BOB

and 1.2Au/BOB.

| Samples   | $S_{\text{BET}}$ ( $\text{m}^2\text{g}^{-1}$ ) | Pore diameter (nm) | Pore volume ( $\text{cm}^3\text{g}^{-1}$ ) |
|-----------|------------------------------------------------|--------------------|--------------------------------------------|
| BOB       | 3.995                                          | 27.477             | 0.024977                                   |
| 0.3Au/BOB | 5.636                                          | 28.663             | 0.43598                                    |
| 0.6Au/BOB | 7.874                                          | 33.774             | 0.066485                                   |
| 1.2Au/BOB | 9.634                                          | 32.117             | 0.67145                                    |

**Table S3.** Lifetime profile and corresponding carrier dynamics information of the synthesized photocatalysts.

| Samples   | $\tau_1$ (ns) | $\tau_2$ (ns) | $A_1$   | $A_2$   | Average lifetime $\tau_{\text{av}}$ (ns) |
|-----------|---------------|---------------|---------|---------|------------------------------------------|
| BOB       | 0.472158      | 3.08299       | 684.702 | 28.3929 | 1.02                                     |
| 0.6Au/BOB | 0.511661      | 3.52445       | 693.048 | 55.3426 | 1.58                                     |

The average fluorescence lifetimes of BOB and 0.6Au/BOB are calculated by the following formula:

$$\tau_{\text{av}} = \frac{A_1 \times \tau_1^2 + A_2 \times \tau_2^2}{A_1 \times \tau_1 + A_2 \times \tau_2} \quad (9)$$

Where  $A_1$  and  $A_2$  are amplitude constants,  $\tau_1$  and  $\tau_2$  are fluorescence lifetime components, and  $\tau_{\text{av}}$  represents average fluorescence lifetime.

Action spectra analysis is a plot of apparent quantum yield (AQY) against incident light wavelength, which can be used for reflecting the light absorption and conversion ability of efficient photocatalyst. Therefore, the CO evolution per unit time of 0.6Au/BOB under different monochromatic light ( $\lambda=380, 420, 470$  and  $570$  nm) was tested, and the light power of 300 W Xe lamp with different bandpass filter were measured by PL-MW2000 photoradiometer, with the probe area of  $1 \times 1 \text{ cm}^2$  to contact light. The irradiation area was controlled as  $19.75 \text{ cm}^2$ . The test results and the detailed calculation equation of AQY are displaying as follows (**Table S4**), which has also been presented in the Supporting Information of our manuscript.

$$AQE = \frac{N_e}{N_p} \times 100\% = \frac{2 \times M \times N_A \times h \times c}{S \times P \times t \times \lambda} \times 100\%$$



where  $N_e$  is the amount of reaction electron,  $N_p$  is the incident photon,  $M$  is the amount of  $H_2$  molecule,  $N_A$  is Avogadro constant,  $h$  is the Planck constant,  $c$  is the speed of light,  $S$  is the irradiation area,  $P$  is the intensity of the irradiation,  $t$  is the photoreaction time, and  $\lambda$  is the wavelength of the monochromatic light.

**Table S4.** Calculated apparent quantum efficiency (AQE) of 0.6Au/BOB under light irradiation with different wavelengths.

| $\lambda$ (nm) | CO production in 1hour<br>( $\mu\text{mol}$ ) | Light power (W) | AQE    |
|----------------|-----------------------------------------------|-----------------|--------|
| 380            | 8.53                                          | 0.038           | 0.64%  |
| 420            | 6.32                                          | 0.041           | 0.41%  |
| 470            | 2.12                                          | 0.056           | 0.081% |
| 570            | 1.02                                          | 0.022           | 0.12%  |

**Table S5.** Comparison of the photocatalytic  $CO_2$  reduction activity and CO selectivity of various BiOBr-based photocatalysts

| Catalysts                                         | CO<br>( $\mu\text{molg}^{-1}\text{h}^{-1}$ ) | Selectivity<br>(%) | Model         | Light<br>(nm)  | Reference |
|---------------------------------------------------|----------------------------------------------|--------------------|---------------|----------------|-----------|
| BiOBr                                             | 1.55                                         | 100                | gas-solid     | Xe, $\geq 300$ | 9         |
| BiOBr/CdS                                         | 4.53                                         | 100                | pure<br>water | Xe, $\geq 420$ | 10        |
| Gd <sup>3+</sup> /BiOBr                           | 8                                            | 16                 | pure<br>water | Xe, $\geq 420$ | 11        |
| 2D Bi <sub>4</sub> O <sub>5</sub> Br <sub>2</sub> | 2.75                                         | 57                 | gas-solid     | Xe, $\geq 400$ | 12        |
| 3D Bi <sub>4</sub> O <sub>5</sub> Br <sub>2</sub> | 3.11                                         | 86                 | gas-solid     | Xe, $\geq 300$ | 13        |
| C <sub>3</sub> N <sub>4</sub> /BiOBr/Au           | 2.63                                         | 83                 | gas-solid     | Xe, $\geq 380$ | 14        |
| BiPO <sub>4</sub> /BiOBr                          | 3.11                                         | 83                 | gas-solid     | Xe, $\geq 400$ | 15        |

|                                                                                                |       |      |               |           |           |
|------------------------------------------------------------------------------------------------|-------|------|---------------|-----------|-----------|
| <b>Bi<sub>4</sub>O<sub>5</sub>Br<sub>2</sub>/<br/>AgBr</b>                                     | 6.6   | 78   | gas-solid     | Xe, ≥300  | 16        |
| <b>UiO-66/Bi<sub>4</sub>O<sub>5</sub>Br<sub>2</sub></b>                                        | 8.35  | 100  | pure<br>water | Xe, ≥300  | 17        |
| <b>Bi<sub>2</sub>MoO<sub>6</sub><br/>nanosheets</b>                                            | 3.6   | 100  | pure<br>water | Xe, ≥300  | 18        |
| <b>g-C<sub>3</sub>N<sub>4</sub> QDs/Au<br/>NPs/CeO<sub>2</sub>/Fe<sub>3</sub>O<sub>4</sub></b> | 9.3   | 74   | pure<br>water | Xe, ≥300  | 19        |
| <b>Au NPs/g-C<sub>3</sub>N<sub>4</sub></b>                                                     | 0.77  | 100  | pure<br>water | Xe, ≥420  | 20        |
| <b>45%CdS/TiO<sub>2</sub></b>                                                                  | 1.97  | 83.3 | pure<br>water | Hg, ≥350  | 21        |
| <b>TiO<sub>2</sub>/NG HS</b>                                                                   | 8.7   | 48.1 | gas-solid     | Xe, ≥ 300 | 22        |
| <b>TiO<sub>2-x</sub>/W<sub>18</sub>O<sub>49</sub></b>                                          | 3.97  | 100  | gas-solid     | Xe, ≥350  | 23        |
| <b>CdS-P25/ZIF-67</b>                                                                          | 29.8  | 48.8 | gas-solid     | Xe, ≥320  | 24        |
| <b>CTU/CdS-P25</b>                                                                             | 23.8  | 100  | pure<br>water | Xe, ≥300  | 25        |
| <b>3DOM-CNPTC</b>                                                                              | 14.7  | 18.3 | gas-solid     | Xe, ≥420  | 26        |
| <b>TiO<sub>2</sub>@ZnIn<sub>2</sub>S<sub>4</sub><br/>CSHS</b>                                  | 9.28  | 51.1 | gas-solid     | Xe, ≥ 300 | 27        |
| <b>BOB</b>                                                                                     | 9.3   | 100  | pure<br>water | Xe, ≥420  | This work |
| <b>0.6Au/BOB</b>                                                                               | 44.92 | 100  | pure<br>water | Xe, ≥420  | This work |

## Reference

- 1 S. Sun, X. Wu, Z. Huang, H. Shen, H. Zhao and G. Jing, *Chem. Eng. J.*, 2022, **435**, 135035.
- 2 Y. Qin, H. Li, J. Lu, F. Meng, C. Ma and Y. Yan, *Chem. Eng. J.*, 2020, **384**, 123275.
- 3 T. Han, X. Cao, K. Sun, Q. Peng, C. Ye, A. Huang, W. C. Cheong, Z. Chen, R. Lin, D. Zhao, X. Tan, Z. Zhuang, C. Chen, D. Wang and Y. Li, *Nat. Commun.*, 2021, **12**, 1–11.
- 4 K. Wang, M. Cao, J. Lu, Y. Lu, C. H. Lau, Y. Zheng and X. Fan, *Appl. Catal. B Environ.*, 2021, **296**, 120341.
- 5 H. X. Zhang, S. W. Chen, X. Y. Cui, D. H. Pan, Z. F. Qin and J. G. Wang, *Wuli Huaxue Xuebao/Acta Phys. - Chim. Sin.*, 2014, **30**, 351–358.
- 6 L. Liu, F. Gao, H. Zhao and Y. Li, *Appl. Catal. B Environ.*, 2013, **134–135**, 349–358.
- 7 C. Zhang, Y. Wang, X. Zhang, R. Wang, L. Kou, J. Wang, R. Li and C. Fan, *Chem. Eng. J.*, 2021, **417**, 128218.
- 8 X. Li, Y. Wei, C. Ma, H. Jiang, M. Gao, S. Zhang, W. Liu, P. Huo, H. Wang and L. Wang, *ACS Appl. Mater. Interfaces*, 2021, **13**, 11755–11764.
- 9 M. Gao, J. Yang, T. Sun, Z. Zhang, D. Zhang, H. Huang, H. Lin, Y. Fang and X. Wang, *Appl. Catal. B Environ.*, 2019, **243**, 734–740.
- 10 Q. Yang, W. Qin, Y. Xie, K. Zong, Y. Guo, Z. Song and G. Luo, *Sep. Purif. Technol.*, 2022, **298**, 121603.
- 11 W. Jiao, Y. Xie, F. He, K. Wang, Y. Ling, Y. Hu, J. Wang, H. Ye, J. Wu and Y. Hou, *Chem. Eng. J.*, 2021, **418**, 129286.
- 12 L. Ye, X. Jin, C. Liu, C. Ding, H. Xie, K. H. Chu and P. K. Wong, *Appl. Catal. B Environ.*, 2016, **187**, 281–290.
- 13 X. Jin, C. Lv, X. Zhou, H. Xie, S. Sun, Y. Liu, Q. Meng and G. Chen, *Nano Energy*, 2019, **64**, 103955.
- 14 Y. Bai, T. Chen, P. Wang, L. Wang, L. Ye, X. Shi and W. Bai, *Sol. Energy Mater. Sol. Cells*, 2016, **157**, 406–414.
- 15 J. Liu, M. Wu, H. Ye, Y. Xie, Y. Ma and L. Liu, *Chem. Eng. J.*, 2023, **455**, 140722.
- 16 X. Jin, J. Cao, H. Wang, C. Lv, H. Xie, F. Su, X. Li, R. Sun, S. Shi, M. Dang and L. Ye, *Appl. Surf. Sci.*, 2022, **598**, 153758.
- 17 D. Li, B. Zhu, Z. Sun, Q. Liu, L. Wang and H. Tang, *Front. Chem.*, 2021, **9**, 1–10.
- 18 J. Di, X. Zhao, C. Lian, M. Ji, J. Xia, J. Xiong, W. Zhou, X. Cao, Y. She, H. Liu, K. P. Loh, S. J. Pennycook, H. Li and Z. Liu, *Nano Energy*, 2019, **61**, 54–59.
- 19 Y. Wei, X. Li, Y. Zhang, Y. Yan, P. Huo and H. Wang, *Renew. Energy*, 2021, **179**, 756–765.
- 20 D. Wang, Y. Li, B. Yu, H. Li, W. Jiang, X. Deng, Y. Wen, C. Liu and G. Che, *Adv. Powder Technol.*, 2021, **32**, 1653–1662.
- 21 A. Ahmad Beigi, S. Fatemi and Z. Salehi, *J. CO<sub>2</sub> Util.*, 2014, **7**, 23–29.
- 22 L. Wang, B. Zhu, B. Cheng, J. Zhang, L. Zhang and J. Yu, *Chinese J. Catal.*, 2021, **42**, 1648–1658.
- 23 J. Z. Y. Tan, S. Gavrielides, M. Belekoukia, W. A. Thompson, L. Negahdar, F. Xia, M. M. Maroto-Valer and A. M. Beale, *Chem. Commun.*, 2020, **56**, 12150–12153.
- 24 L. Wang, Z. Zhang, Q. Han, Y. Liu, J. Zhong, J. Chen, J. Huang, H. She and Q. Wang, *Appl. Surf. Sci.*, 2022, **584**, 152645.

- 25 R. Lian, L. Wang, Y. Gao, J. Zhang, Q. Mei and Q. Wang, *J. Alloys Compd.*, 2022, **924**, 166590.
- 26 C. Wang, X. Liu, W. He, Y. Zhao, Y. Wei, J. Xiong, J. Liu, J. Li, W. Song, X. Zhang and Z. Zhao, *J. Catal.*, 2020, **389**, 440–449.
- 27 L. Wang, B. Cheng, L. Zhang and J. Yu, *Small*, 2021, **17**, 1–9.
